# Supplementary material for: Cobalt and nickel bimetallic sulfide nanoparticles immobilized on montmorillonite demonstrating peroxidase-like activity for H2O2 detection
Source: Royal Society of Chemistry journal article supplement (doi:10.1039/c8nj04647f), 2018-01-01
Supplement: c8nj04647f1.pdf [file c8nj04647f1.pdf]

## Supporting Information

### **Cobalt and nickel bimetallic sulfides nanoparticles immobilized on montmorillonite demonstrating a peroxidase-like activity for the H<sub>2</sub>O<sub>2</sub> detection**

**Kaili Wu<sup>a</sup>, Baochan Yang<sup>a</sup>, Xixi Zhu<sup>a,\*</sup>, Wei Chen<sup>a</sup>, Xiliang Luo<sup>b</sup>, Zhenxue Liu<sup>a</sup>,  
Xiao Zhang<sup>b</sup> and Qingyun Liu<sup>a,c\*</sup>**

*<sup>a</sup> College of Chemical and Environmental Engineering, Shandong University of Science and Technology, Qingdao 266510, P. R. China*

*<sup>b</sup> College of Chemistry and Molecular Engineering, Qingdao University of Science & Technology, Qingdao 266042, P. R. China*

*<sup>c</sup> State Key Laboratory of Mining Disaster Prevention and Control Co-founded by Shandong Province and the Ministry of Science and Technology, Shandong University of Science and Technology, Qingdao 266590, China*

---

\* Corresponding Author

E-mail: [qyliu@sdust.edu.cn](mailto:qyliu@sdust.edu.cn)

Tel.: +86 0532 86057757

Fax: +86 0532 80681197

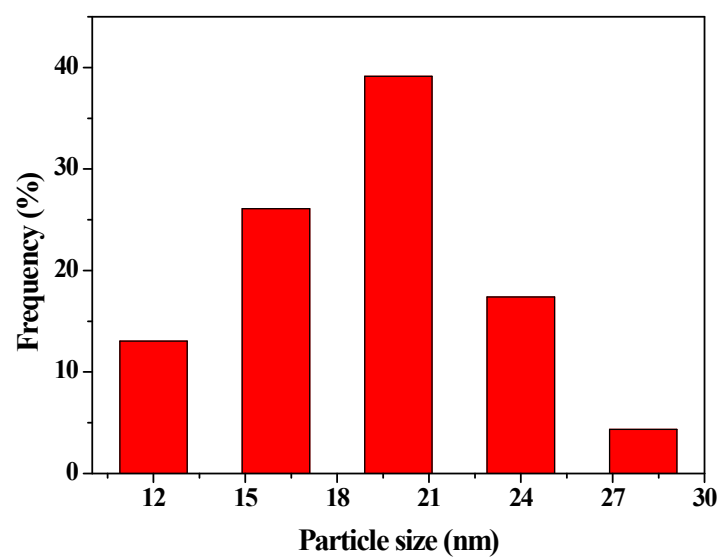

Fig. S1. The size distribution of image of the Co-Ni-S-3 nanoparticles on MMT.

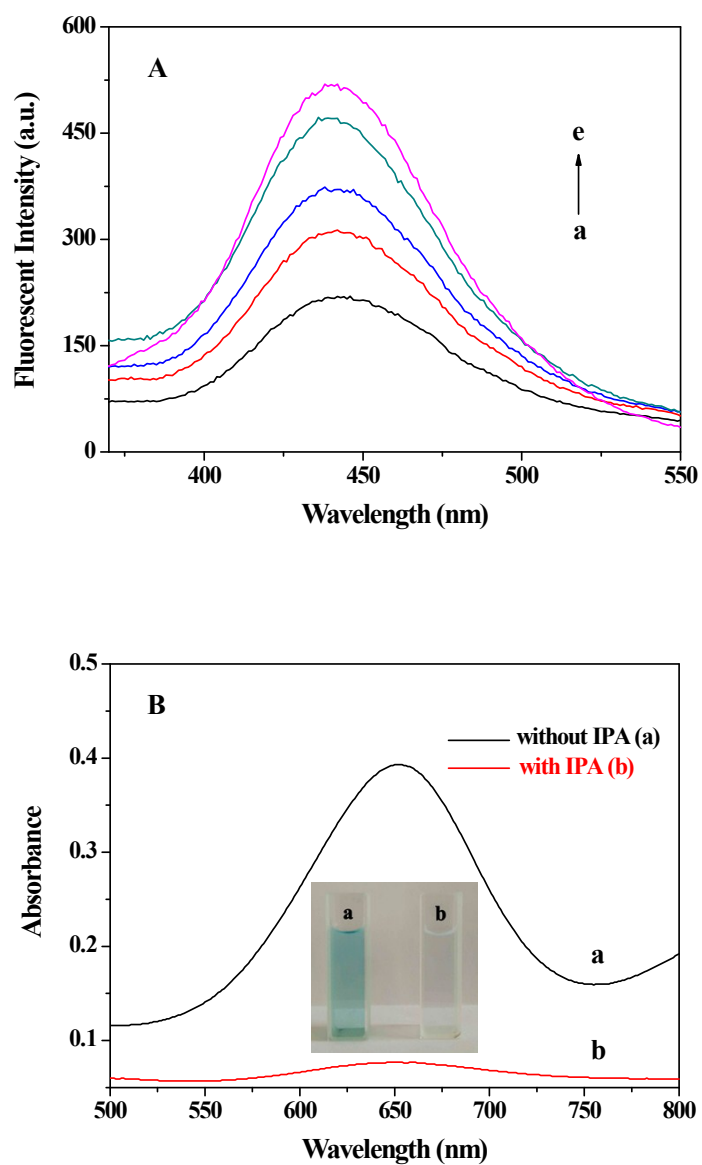

Fig. S2. (A) Emission spectra of the fluorescence probe TA in the presence of Co-Ni-S-3 nanoparticles and  $\text{H}_2\text{O}_2$ . Reaction conditions: TA (0.5 mM),  $\text{H}_2\text{O}_2$  (25 mM), and the Co-Ni-S-3 nanoparticles with different concentration (a-e: 30, 50, 60, 80, 100  $\mu\text{g}\cdot\text{mL}^{-1}$ ); (B) The UV-vis absorption spectra of 1.0 mM TMB reaction solutions in the absence or presence of scavengers (IPA) in sodium acetate buffer solution ( $\text{pH} = 4$ ) with 1 mM  $\text{H}_2\text{O}_2$  and 0.3 mg/mL Co-Ni-S-3/MMT NCs at room temperature after 5 min reaction. The inset are the photograph of the related color changes.
